# Supplementary material for: Crosstalk between alternative polyadenylation and miRNAs in the regulation of protein translational efficiency
Source: HighWire-hosted journal article supplement (doi:10.1101/gr.231506.117), 2018-09-18
Supplement: Supplemental_Material.docx [file Supplemental_Material.docx]

**Supplemental_Table_S1. Summary statistics of sequencing data for polysome profiling.**

| Samples | Raw reads | Qualified reads | Mapped to genome | Uniquely mapped to genome | Mapped to nuclear genome | After IP filter | Genes sampled by reads | All poly(A) sites | Genes sampled by cleavage clusters |
| --- | --- | --- | --- | --- | --- | --- | --- | --- | --- |
| MCF10A_1_unbound | 21232051 | 21166714 | 19553302 | 10733549 | 5566391 | 5086976 | 16042 | 66106 | 13322 |
| MCF10A_1_bound | 21271826 | 21233488 | 19587492 | 13024406 | 12376892 | 11567565 | 15558 | 82405 | 13757 |
| MCF-7_1_unbound | 18402120 | 18376712 | 11985553 | 7282818 | 2544680 | 2247561 | 14597 | 47663 | 12374 |
| MCF-7_1_bound | 23958672 | 23902672 | 20895060 | 14843820 | 14071736 | 12949933 | 15948 | 98613 | 14292 |
| MCF-7_2_unbound | 13140635 | 13112364 | 10154448 | 5470872 | 2291225 | 2034928 | 14524 | 42733 | 12112 |
| MCF-7_2_bound | 17502342 | 17456713 | 15976423 | 11382002 | 10952239 | 10042944 | 15418 | 82887 | 13804 |
| MCF-7_3_unbound | 32029095 | 31984789 | 25257322 | 14788095 | 6690618 | 6044811 | 16947 | 82478 | 14061 |
| MCF-7_3_bound | 23601923 | 23551974 | 21133070 | 14948239 | 14174094 | 13208333 | 16326 | 93196 | 14326 |
| NCM460_1_unbound | 20038516 | 19878935 | 15064159 | 9427744 | 7371153 | 6516940 | 14996 | 74159 | 13292 |
| NCM460_1_bound | 15610833 | 15520001 | 13068771 | 8653543 | 8395203 | 7591431 | 14769 | 74839 | 13193 |
| NCM460_2_unbound | 19665124 | 19545639 | 15414189 | 9136842 | 6968897 | 6080768 | 14885 | 78244 | 13244 |
| NCM460_2_bound | 13466352 | 13311273 | 11465025 | 7759373 | 7487138 | 6902166 | 14648 | 63263 | 12999 |
| NCM460_3_unbound | 13238288 | 13175709 | 9835325 | 4960382 | 3817047 | 3236153 | 14487 | 62976 | 12545 |
| NCM460_3_bound | 17001191 | 16883102 | 13687967 | 8972736 | 8587493 | 7701666 | 14863 | 79483 | 13265 |
| SW480_1_unbound | 21671807 | 21531267 | 19521678 | 11967265 | 8923942 | 6869221 | 15781 | 117938 | 13865 |
| SW480_1_bound | 20578443 | 20483228 | 18620201 | 12467299 | 11786441 | 9987267 | 15719 | 104434 | 13967 |
| SW480_2_unbound | 20283528 | 20214805 | 18329716 | 11275823 | 8597409 | 6978564 | 15668 | 109157 | 13826 |
| SW480_2_bound | 16761250 | 16693329 | 15114726 | 9997310 | 9463709 | 8103801 | 15446 | 95116 | 13722 |
| SW480_3_unbound | 66470470 | 66315810 | 60458130 | 36530688 | 26244783 | 21022078 | 16986 | 225629 | 15325 |
| SW480_3_bound | 58807435 | 58662147 | 53394555 | 35102852 | 33117480 | 28406369 | 16893 | 196673 | 15233 |
| RKO_1_unbound | 14342563 | 14223088 | 13325898 | 7300403 | 4020027 | 3531726 | 13964 | 53288 | 11998 |
| RKO_1_bound | 13956052 | 13857846 | 12596306 | 7870192 | 7357750 | 6593812 | 14208 | 79445 | 12551 |
| RKO_2_unbound | 13704450 | 13544876 | 12609970 | 6870392 | 3683046 | 3267622 | 13654 | 53528 | 11969 |
| RKO_2_bound | 13961098 | 13860050 | 12639250 | 8093871 | 7393994 | 6644118 | 13921 | 77896 | 12539 |
| RKO_3_unbound | 13038295 | 12979231 | 12088225 | 6052715 | 3078163 | 2620731 | 13548 | 52273 | 11603 |
| RKO_3_bound | 13227981 | 13126800 | 11833660 | 7805354 | 7320338 | 6651078 | 13828 | 72947 | 12402 |
| NIH3T3_1_unbound | 18480272 | 18295405 | 16815247 | 7031896 | 5400915 | 4874359 | 15180 | 119322 | 13223 |
| NIH3T3_1_bound | 18859553 | 18647252 | 17146702 | 9964819 | 9845212 | 9223404 | 14386 | 84021 | 12779 |
| NIH3T3_2_unbound | 19115389 | 18942619 | 17297214 | 7580468 | 5021175 | 4456670 | 15270 | 121422 | 13196 |
| NIH3T3_2_bound | 20862556 | 20601825 | 18982969 | 10702731 | 10348457 | 9758415 | 14740 | 91566 | 13045 |
| NIH3T3_3_unbound | 29974180 | 29902618 | 26564268 | 11849769 | 7147395 | 6617810 | 15085 | 123550 | 13224 |
| NIH3T3_3_bound | 28946211 | 28912870 | 2858986 | 15934460 | 15531842 | 14880064 | 14460 | 84885 | 13013 |
| NIH3T3_sub-confluency_unbound | 21276033 | 21112294 | 19287831 | 8574373 | 6054785 | 5563295 | 15102 | 110493 | 13220 |
| NIH3T3_sub-confluency_bound | 19291457 | 19125088 | 17169006 | 1002629 | 9947535 | 9289845 | 14262 | 85759 | 12618 |
| L929_1_unbound | 21802172 | 21782092 | 12757647 | 6476297 | 6062831 | 5604304 | 14430 | 66797 | 12788 |
| L929_1_bound | 22475053 | 22459689 | 19653460 | 12563563 | 12442932 | 11850743 | 14517 | 73033 | 13055 |
| L929_2_unbound | 23724428 | 23705754 | 14501420 | 7739482 | 7275036 | 6732978 | 14564 | 71219 | 13009 |
| L929_2_bound | 23328773 | 23315826 | 20632820 | 13221743 | 13134554 | 12484223 | 14552 | 74409 | 13152 |
| L929_3_unbound | 25829412 | 25809303 | 14536207 | 8158933 | 7423345 | 6802852 | 14571 | 77411 | 13036 |
| L929_3_bound | 22249776 | 22235403 | 19293512 | 12499529 | 12327960 | 11561018 | 14530 | 78097 | 13074 |
| MCF-7_TNRC6A_KD_1_unbound | 27652978 | 27604757 | 20612679 | 13682297 | 7298320 | 6411261 | 15597 | 82504 | 13728 |
| MCF-7_TNRC6A_KD_1_bound | 31967879 | 31898012 | 25246736 | 18895999 | 18319311 | 16800694 | 15939 | 103487 | 14330 |
| MCF-7_TNRC6A_KD_2_unbound | 32834640 | 32822684 | 30252410 | 17907932 | 10234517 | 8969170 | 15907 | 100628 | 14054 |
| MCF-7_TNRC6A_KD_2_bound | 31190043 | 31170951 | 28257320 | 19302122 | 18733222 | 17725653 | 15648 | 97486 | 14199 |
| NIH3T3_Tnrc6a_OE_unbound | 32029658 | 31939358 | 28346842 | 12100700 | 8731961 | 7983811 | 16415 | 137610 | 14279 |
| NIH3T3_Tnrc6a_OE_bound | 23327115 | 23307026 | 21138710 | 13290131 | 12732595 | 12103148 | 15287 | 93756 | 13506 |
| NIH3T3_G0/G1_phase_unbound | 16091026 | 16077246 | 14397269 | 6858760 | 4437027 | 4140839 | 14747 | 62968 | 12789 |
| NIH3T3_G0/G1_phase_bound | 22011619 | 21995354 | 19609262 | 13055142 | 12739018 | 12144057 | 15107 | 77165 | 13404 |
| NIH3T3_G2/M_phase_unbound | 42461237 | 42118110 | 35917002 | 13289881 | 10267723 | 8842961 | 16836 | 156304 | 14750 |
| NIH3T3_G2/M_phase_bound | 18467777 | 18413277 | 16063255 | 8789542 | 8447519 | 7991882 | 15458 | 86370 | 13338 |
| L929_G0/G1_phase_ unbound | 26554389 | 26465633 | 22448220 | 12545312 | 7351046 | 6740338 | 15197 | 82720 | 13577 |
| L929_G0/G1_phase_ bound | 28456997 | 28405299 | 24984341 | 17573466 | 16878153 | 15844451 | 15300 | 91073 | 13807 |
| L929_G2/M_phase_ unbound | 28195360 | 28119031 | 15919264 | 7107381 | 6695082 | 5676410 | 15883 | 93107 | 13932 |
| L929_G2/M_phase_ bound | 21930330 | 21915523 | 14888111 | 9140119 | 9088730 | 8624763 | 15074 | 73292 | 13377 |
| Naive_T_unbound | 28495203 | 28488925 | 25593441 | 12362154 | 9052372 | 8497011 | 14159 | 58360 | 12436 |
| Naive_T_bound | 30957394 | 30952248 | 28114558 | 17712297 | 15182539 | 13844813 | 15120 | 93021 | 13627 |

**Supplemental_Table_S2. Genes and Primers of qRT-PCR validation with polysome profiling.**

| Cell line | Gene | Common region | Extended region |
| --- | --- | --- | --- |
| MCF10A | *PRDX6* | AGATTCTCAGGGTAGTCA  CCATCCTTCCAATCAACT | CTTGCTTCACTCCATCAG  AGTTCTGCCACTCTTCAA |
| *SNRPD1* | GTGGATGTTGAACCTAAG  CTCTTCCTCTTCCTCTTC | ACCATAATAGGCTCAGAG  TGTTGCTGTATCTCACTT |
| *PAICS* | CTTAGGCTAGACACCAAGATAT  CTCAATAGTAGTGACCACCAATA | TAACCACAGTGACTACAA  CTAAGCATAGCACATCAG |
| *ESYT2* | TTATTACCAGACAAGAGG  GTAACGAAACACTGAAAT | TTCAATGTTAGCAATTAAGC  AATATCCTGTCTACTCACT |
| *MYO1B* | CTCTATCGCACAACTCTC  TGTCCTGTCTGAACTGTA | CTGTGCTAGATGGTATGA  GGTTCCTAATAATGCTGTC |
| MCF-7 | *PRDX1* | GATCACTGTAAATGACCTCCCT  CGCAGCCTGGCACTAAA | CGCTGGGCTGTTTTAGTGC  ACGCCAACTCAGGCCATTC |
| *MFSD1* | AGTGTTCTTCATTGCCTGTGT  TTATTTCTTCCCTTTGTCTTGC | TTTGAGGGAAATAGAAGGGCTG  GCTCGGCAATCCACATAACTAC |
| *PGK1* | CAAGTCGGTAGTCCTTATGAGCC  CCACATGAAAGCGGAGGTTCT | TTTGTTAGGAAGGGTGAGAATAG  CACAATGTCTGCCATAAAGTAGG |
| *HNRNPH3* | AAGTCTTGACAACAGCATCTGG  AAACATTTTCCCATCACAATC | TTTTCTTTAGTTCCTCCTGGAC  TTTTGGTATTTCGGTCAAGTG |
| *LAMP2* | GTTCGCTGGATGATGACAC  GAGCTGGACTGCAACTAAATAT | GCGGCTGAGGCAGGAGAAT  GCAATCAATGCAAGCTGGAAAC |
| *PEX19* | TTCGATAAAGCCAAACCCTC  TCCTCAGCCAACTCCTTCAT | CAGGGCTTACTCCAGGAATCTA  AGTACCATAACTCCACCACAAGTC |
| *CNIH4* | GATACATTATGGTGCCGAGTGG  ACTTCAACCACGGCTTCTCC | GCTACTACCTCCACAATCACC  TAAGGCTCAATTTCACAGACAG |
| *MLX* | ATTGTGATTGGCGTCCTG  GCCTCTTGTTGGCTGTTCT | ATGGCAGAGGCAGGTATAAC  AGATATGCTTGACAGAAAGGGT |
| *PERP* | ACCCAGACCTTCACCCTTCA  CCATCTCAGCAGCAGCGAT | CTTACTATTTCATGGTCCAAACC  CAAGAATGACCCTCCTAATGC |
| *YME1L1* | GAGGAAGAGTGGCAGAGGAG  TTGTTCGATGGCAGATTGG | AAAATTGTGCCTTTAGCCTTC  CTGGCTCTGTGTTTCCGAG |
| *GHITM* | TGTGCTACTATGGCTTGGGACT  CAGGCGTTCTGCTGATTGC | TGGAGCTTTGGTAAAGGGAC  AGCAACAGCAGGAGAATGC |
| *UBE2N* | TCTGCCAAGACTTCCTCCT  AGATGATACTTCTAGCCTCTGC | TTGCTTTCATCCCTCCAGTAT  TGGGCTACAATATCCATTACCT |

**Supplemental _Table_S3. Primers for dual luciferase reporter assay.**

| **Dual-Luciferase gene qRT-PCR primers** | |
| --- | --- |
| *Renilla*_luciferase_F | GGCTCGCTGCAAGCAAATGAA |
| *Renilla*_luciferase_R | CCAGTCGTGGCCCACAAAGAT |
| Firefly_luciferase_F | GTGGACATCACCTATGCCGAGTA |
| Firefly_luciferase_R | CCACGGTAGGCTGAGAAATGC |
| **3'UTR cloning and PAS mutation primers (MCF7 cell line)** | |
| CNIH4_S_UTR_F | CCGCTCGAGAGCTGGAGAAGCCGTGGTT |
| CNIH4_S_UTR_R | CCGGCGGCCGCACTTTATATGGTAAAAATACAGCAAAAAT |
| CNIH4_L_UTR_F | CCGCTCGAGAGCTGGAGAAGCCGTGGTT |
| CNIH4_L_UTR_R | CCGGCGGCCGCGAGGATAAATTGCCAGGTTTATTTTAC |
| CNIH4_mut_APA_F1 | AGCTGGAGAAGCCGTG |
| CNIH4_mut_APA_R1 | GGGAGATGGTAAAAATACAGCAAAAATAGTT |
| CNIH4_mut_APA_F2 | GCTGTATTTTTACCATCTCCCGTATTT |
| CNIH4_mut_APA_R2 | GAGGATAAATTGCCAGG |
| PPIA_S_UTR_F | CCGCTCGAGGTTTGACTTGTGTTTTATCTTAACC |
| PPIA_S_UTR_R | CCGGCGGCCGCAACGAGGACAATTGTTATTTAGTT |
| PPIA_L_UTR_F | CCGCTCGAGGTTTGACTTGTGTTTTATCTTAACC |
| PPIA_L_UTR_R | CCGGCGGCCGCTAGGGATAATGAAAAGATGTTT |
| PPIA_mut_APA_F1 | CCGCTCGAGGTTTGACTTGTGTTTTATCTTAACC |
| PPIA_mut_APA_R1 | ATTTAGTTGGGAGGTCATAATCATAAACTTAACTCTGC |
| PPIA_mut_APA_F2 | CACCACCACCCATCTCAGTCTTGTGTGTTGTC |
| PPIA_mut_APA_R2 | CCGGCGGCCGCTAGGGATAATGAAAAGATGTTT |
| ACSL3_S_UTR_F | CCGCTCGAGTTATTCTCTTCTGGCATCAG |
| ACSL3_S_UTR_R | CCGGCGGCCGCTGTCTTAATGTTTTACTAATCCTG |
| ACSL3_L_UTR_F | CCGCTCGAGTTATTCTCTTCTGGCATCAG |
| ACSL3_L_UTR_R | CCGGCGGCCGCGGGTATATTTATTTCTCTCAAATG |
| ACSL3_mut_APA_F1 | CCGCTCGAGTTATTCTCTTCTGGCATCAG |
| ACSL3_mut_APA_R1 | TTGCTGTCTTAATGTGGGAGGAATCCT |
| ACSL3_mut_APA_F2 | CCTCCCACATTAAGACAGCAAACTTGTG |
| ACSL3_mut_APA_R2 | CCGGCGGCCGCGGGTATATTTATTTCTCTCAAATG |
| TRAM1_S_UTR_F | CCGCTCGAGTGAATTATAAACTAATTGATTAATGTCC |
| TRAM1_S_UTR_R | CCGGCGGCCGCAAGAGCACAGACTGTATTTTCAAGA |
| TRAM1_L_UTR_F | CCGCTCGAGTGAATTATAAACTAATTGATTAATGTCC |
| TRAM1_L_UTR_R | CCGGCGGCCGCAAGTAAAAATTTTTATTTTGATTGATT |
| TRAM1_mut_APA_F1 | CCGCTCGAGTGAATTATAAACTAATTGATTAATGTCC |
| TRAM1_mut_APA_R1 | CAAAAATCAAAGAGCACAGAGGGGTTTTCAAGA |
| TRAM1_mut_APA_F2 | AACCCCGTCTGTGCTCTTTGATTTTTG |
| TRAM1_mut_APA_R2 | CCGGCGGCCGCAAGTAAAAATTTTTATTTTGATTGATT |
| CCND1_S_UTR_F | AATTCTAGGCGATCGCTCGAGGGGCGCCAGGCAGGCGGG |
| CCND1_S_UTR_R | ATTTTATTGCGGCCAGCGGCCGCTAATCTTTTTCTTTTGCTTAAGTCAGAGA |
| CCND1_mut_APA_F1 | AATTCTAGGCGATCGCTCGAGGGGCGCCAGGCAGGCGGG |
| CCND1_mut_APA_R1 | GGGTAATCTTGGTGAGTTGCTTAAGTCAGA |
| CCND1_mut_APA_F2 | GCAACTCACCAAGATTACCCAAAAACTGTCTTTAAAAGAGAGA |
| CCND1_mut_APA_R2 | ATTTTATTGCGGCCAGCGGCCGCGTTTTACCAGTTTTATTTCTAGACTTTCATG |
| **3'UTR cloning and PAS mutation primers (NIH3T3 cell line)** | |
| Ank_S_UTR_F | AATTCTAGGCGATCGCTCGAGGCACAGGCTGCTGGGGGC |
| Ank_S_UTR_R | ATTTTATTGCGGCCAGCGGCCGCATTAGAGACATTTTATTGAAAATGCGA |
| Ank_mut_APA_F1 | AATTCTAGGCGATCGCTCGAGGCACAGGCTGCTGGGGGC |
| Ank_mut_APA_R1 | GAGACATGGGGTGGAAAATGCGAAAATAGGAAATGT |
| Ank_mut_APA_F2 | CATTTTCCACCCCATGTCTCTAATACAATTCAGTGATTGCC |
| Ank_mut_APA_R2 | ATTTTATTGCGGCCAGCGGCCGCAAAATATTGCTGTTTAATTTTCTAGTCATG |
| Arf6_S_UTR_F | AATTCTAGGCGATCGCTCGAGTGAGCGTCCTCCACCCAGC |
| Arf6_S_UTR_R | ATTTTATTGCGGCCAGCGGCCGCGCAATAATTTTCAGTTTACTAGATGAAACA |
| Arf6_mut_APA_F1 | AATTCTAGGCGATCGCTCGAGTGAGCGTCCTCCACCCAGC |
| Arf6_mut_APA_R1 | CAGGTGGCTAGATGAAACAGACTTGGAACATAGTC |
| Arf6_mut_APA_F2 | CTGTTTCATCTAGCCACCTGAAAATTATTGCTTAATCAAACTGC |
| Arf6_mut_APA_R2 | ATTTTATTGCGGCCAGCGGCCGCACTGTGTAATTCCTTTATTTTCTGCATG |
| E2f1_S_UTR_F | AATTCTAGGCGATCGCTCGAGCAGAAGCCTAGGGATTCAGGG |
| E2f1_S_UTR_R | ATTTTATTGCGGCCAGCGGCCGCATCGGAAAACTTTTAAGCAGTGC |
| E2f1_L_UTR_F | AATTCTAGGCGATCGCTCGAGCAGAAGCCTAGGGATTCAGGG |
| E2f1_L_UTR_R | ATTTTATTGCGGCCAGCGGCCGCCATCAAAACATTTATTAAAATCAAAGCA |
| Nudcd2_S_UTR_F | AATTCTAGGCGATCGCTCGAGCTGCTATTGCTTAGTGTTTCTCTGTCT |
| Nudcd2_S_UTR_R | ATTTTATTGCGGCCAGCGGCCGCCAACATGGTTGTGAGATCACACAC |
| Nudcd2_mut_APA_F1 | AATTCTAGGCGATCGCTCGAGCTGCTATTGCTTAGTGTTTCTCTGTCT |
| Nudcd2_mut_APA_R1 | CTCAACATGGTTGTGAGATCACACACATACAAAAAAA |
| Nudcd2_mut_APA_F2 | GATCTCACAACCATGTTGAGTAAATTTCTGAGTAAGAGTTGTATACC |
| Nudcd2_mut_APA_R2 | ATTTTATTGCGGCCAGCGGCCGCGGTGACAACATGTCAATTTATTAGAAAA |
| Dtd2_S_UTR_F | AATTCTAGGCGATCGCTCGAGTGATTCATAGATCTCTGTTTCCCTGG |
| Dtd2_S_UTR_R | ATTTTATTGCGGCCAGCGGCCGCAGACACAGTCTCACTACATAGTCTTAGCTT |
| Dtd2_L_UTR_F | AATTCTAGGCGATCGCTCGAGTGATTCATAGATCTCTGTTTCCCTGG |
| Dtd2_L_UTR_R | ATTTTATTGCGGCCAGCGGCCGCGGGCACAAAGTTTAATAGTTGCTTC |
| Rnf11_S_UTR_F | AATTCTAGGCGATCGCTCGAGGCCAGGGTCTCTCGTCTGACT |
| Rnf11_S_UTR_R | ATTTTATTGCGGCCAGCGGCCGCGCCAGTGTTATAAAATGTAGCTGGTG |
| Rnf11_mut_APA_F1 | AATTCTAGGCGATCGCTCGAGGCCAGGGTCTCTCGTCTGACT |
| Rnf11_mut_APA_R1 | GCTGGTGAGAAAACCTTGACCCAAATGTCAGTAA |
| Rnf11_mut_APA_F2 | GTCAAGGTTTTCTCACCAGCTACATTTTATAACACTGGCACAA |
| Rnf11_mut_APA_R2 | ATTTTATTGCGGCCAGCGGCCGCATAAAACATTACACTTTACTAGACCATTTCTAC |

**Supplemental_Table_S4. Primers** **and Oligo sequences for TNRC6A.**

| **Primers for amplification of mouse Tnrc6a.** | |
| --- | --- |
| Tnrc6a_clone_F | ACCTCTGGATCCACAGAATTCATGAGAGAATTGGAAGCTAAAGCTACC |
| Tnrc6a_clone_R | ACTGATTCTAGATGACTCGAGTTTACGTCTATACCTATGCCATTACATG |
| **qRT-PCR primers for human TNRC6A** | |
| TNRC6A_qF | CAAAATGGAGATTGATGATGGAA |
| TNRC6A_qR | ACAGTTGTGGCTGGAGTAGAAGG |
| **qRT-PCR primers for mouse Tnrc6a** | |
| Tnrc6a_qF | ACTAATAATAATGCCAAGCGAGC |
| Tnrc6a_qR | GTTTAACACCTTAACAGCAGATCC |
| **SiRNA target sequences for human TNRC6A** | |
| siRNA1 | GGAGAAACTTCAAGGAATA |
| siRNA2 | CAGAAATAGTGATTCCAAA |


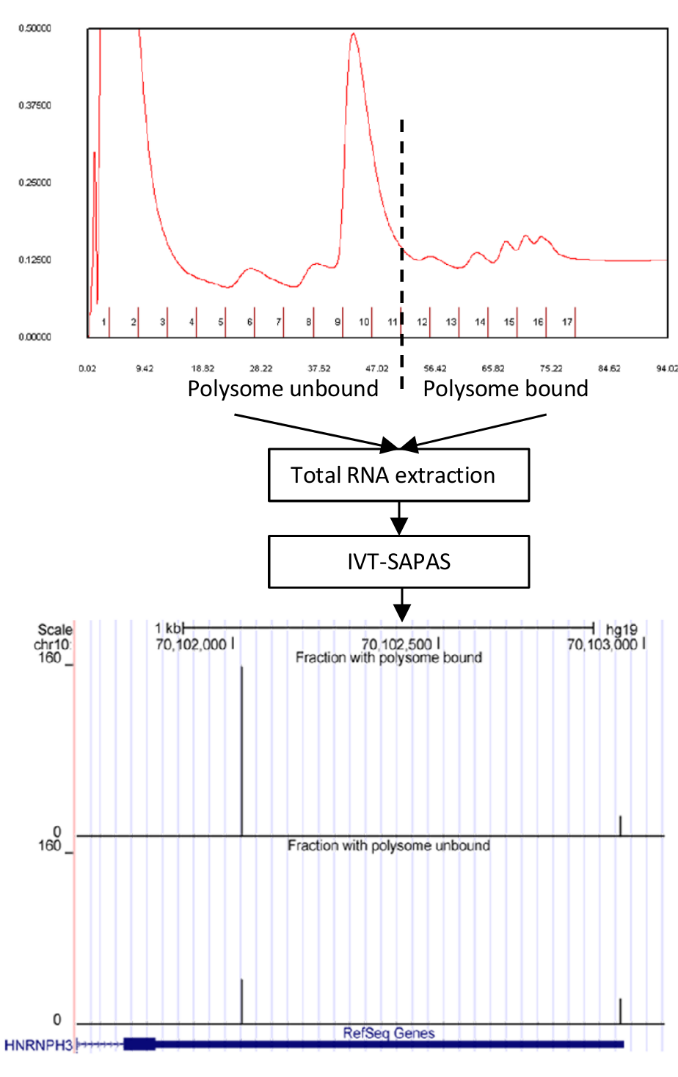


**Supplemental_Fig_S1. Schematic of polysome profiling and IVT-SAPAS.**


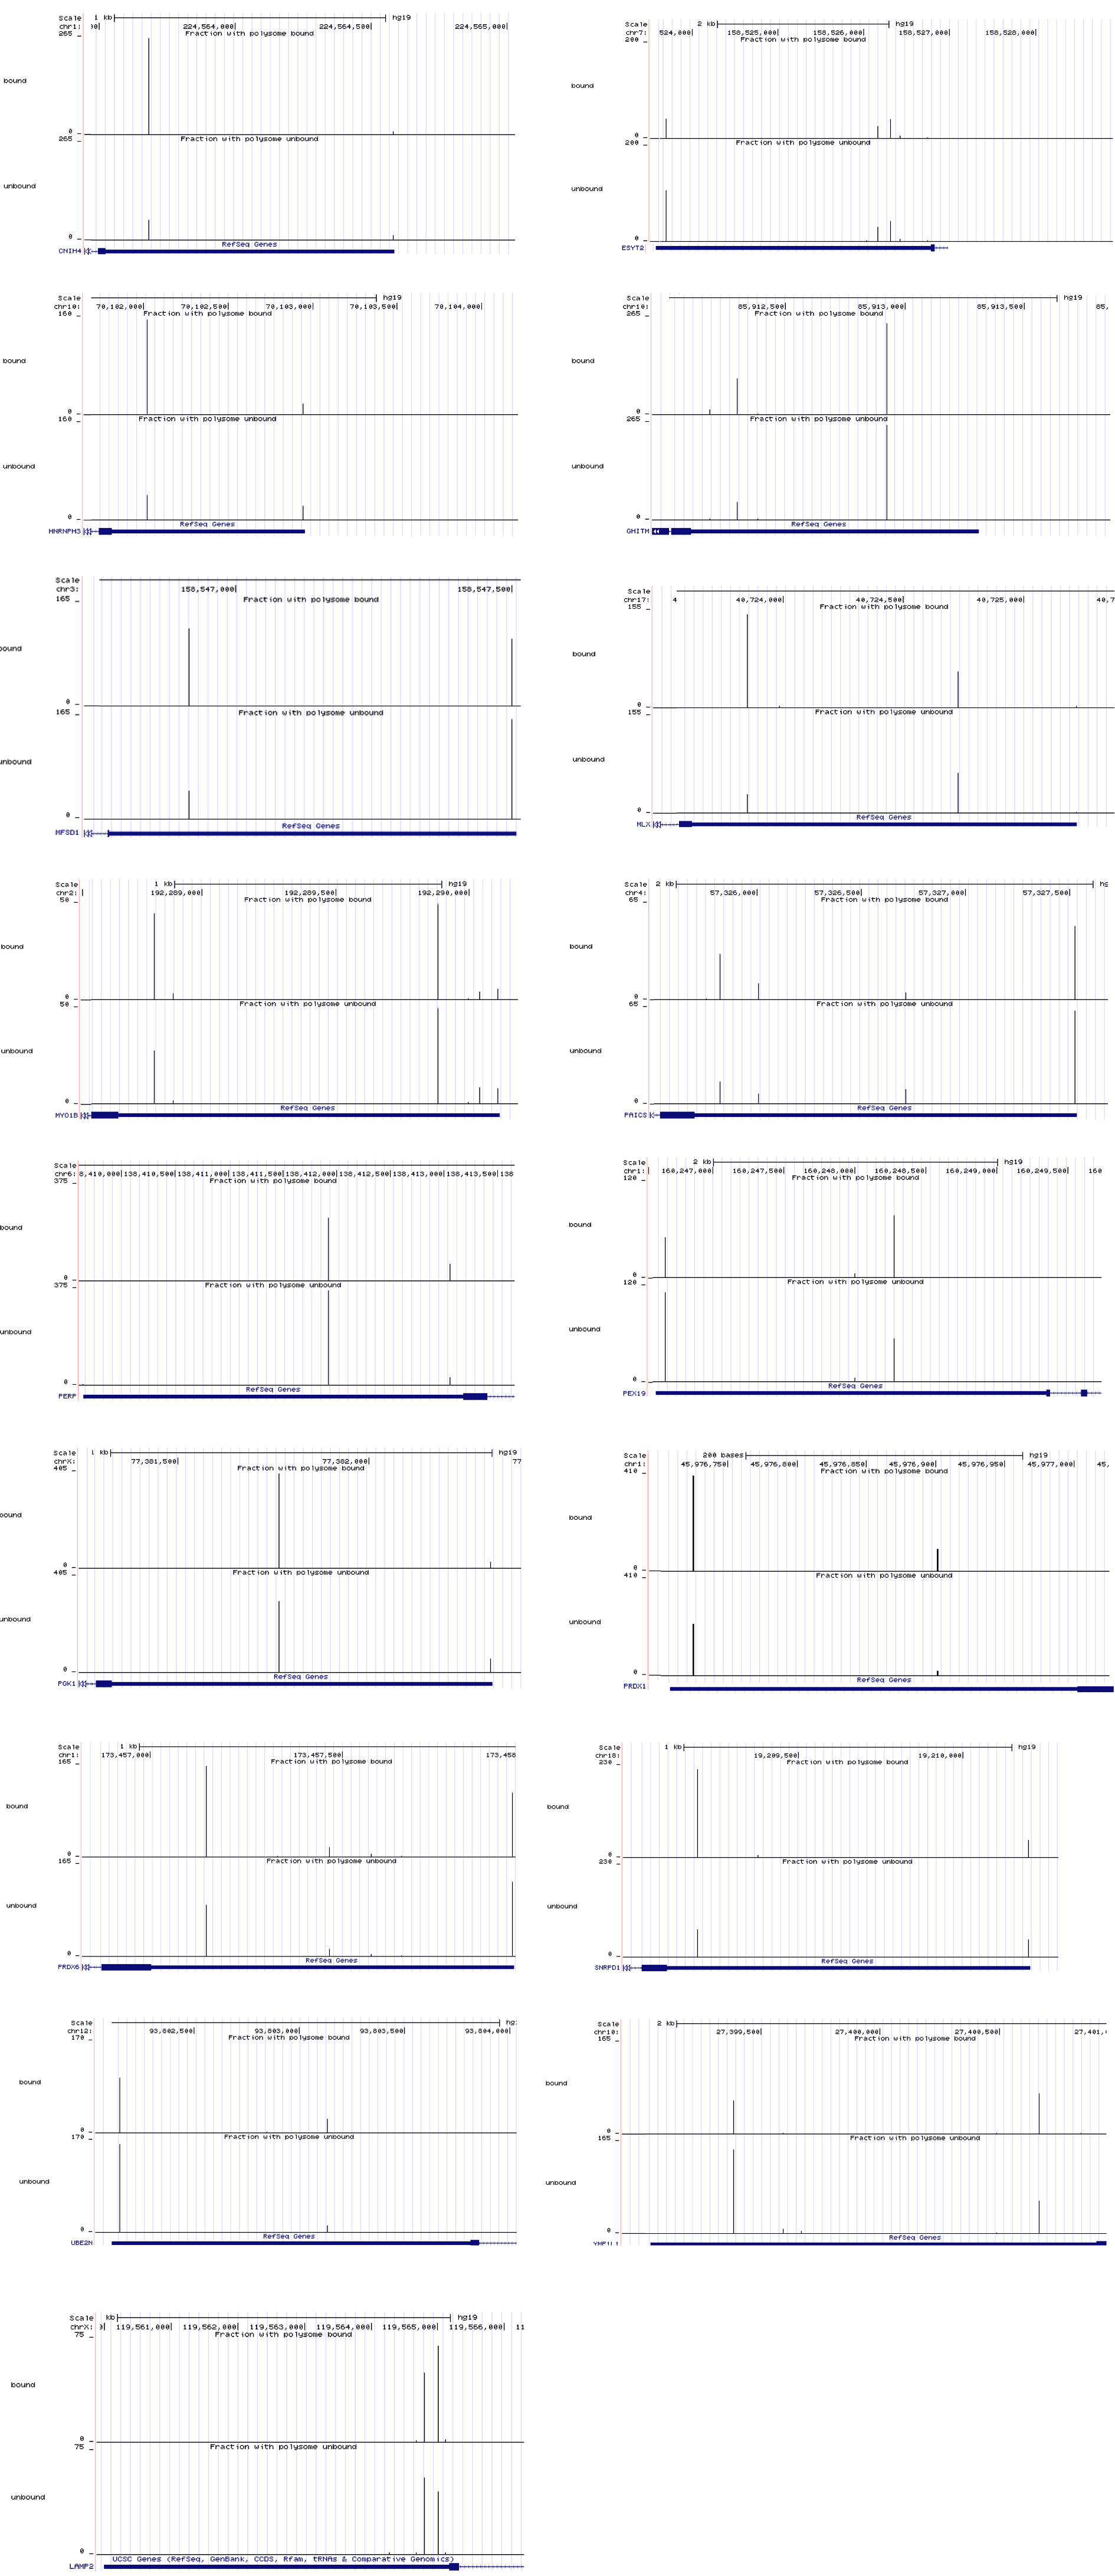


**Supplemental_Fig_S2. IVT-SAPAS reads distribution for genes validated with qRT-PCR in Fig. 3A.**


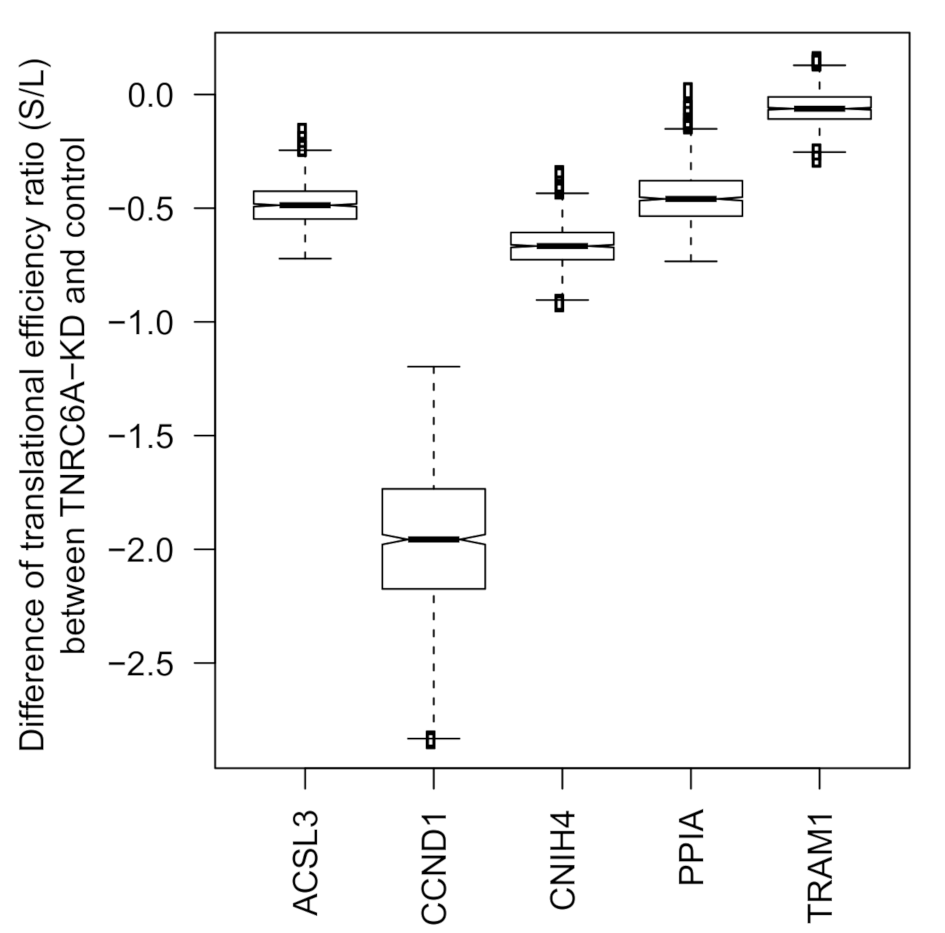


**Supplemental_Fig_S3. Validation of miRNA effects on translational efficiency difference between mRNAs with shorter and longer 3'UTR by TNRC6A-knockdown.** Dual-luciferase reporter plasmid and siRNA were co-transfected into MCF-7 cell line. Six replicates were performed. *Renilla* fluorescence and mRNA level were normalized to firefly fluorescence and the mRNA level, respectively, and then the translational efficiency was calculated as the *renilla* protein/mRNA ratio. Bootstrap with 1000 times was performed to obtain the distribution of translation efficiency ratio (Shorter/Longer) difference between TNRC6A-knockdown and the control. For each resampling, we calculated the mean of translational efficiency for the shorter and longer 3'UTRs and their ratios, then we calculated the difference between TNRC6A-knockdown and the control.


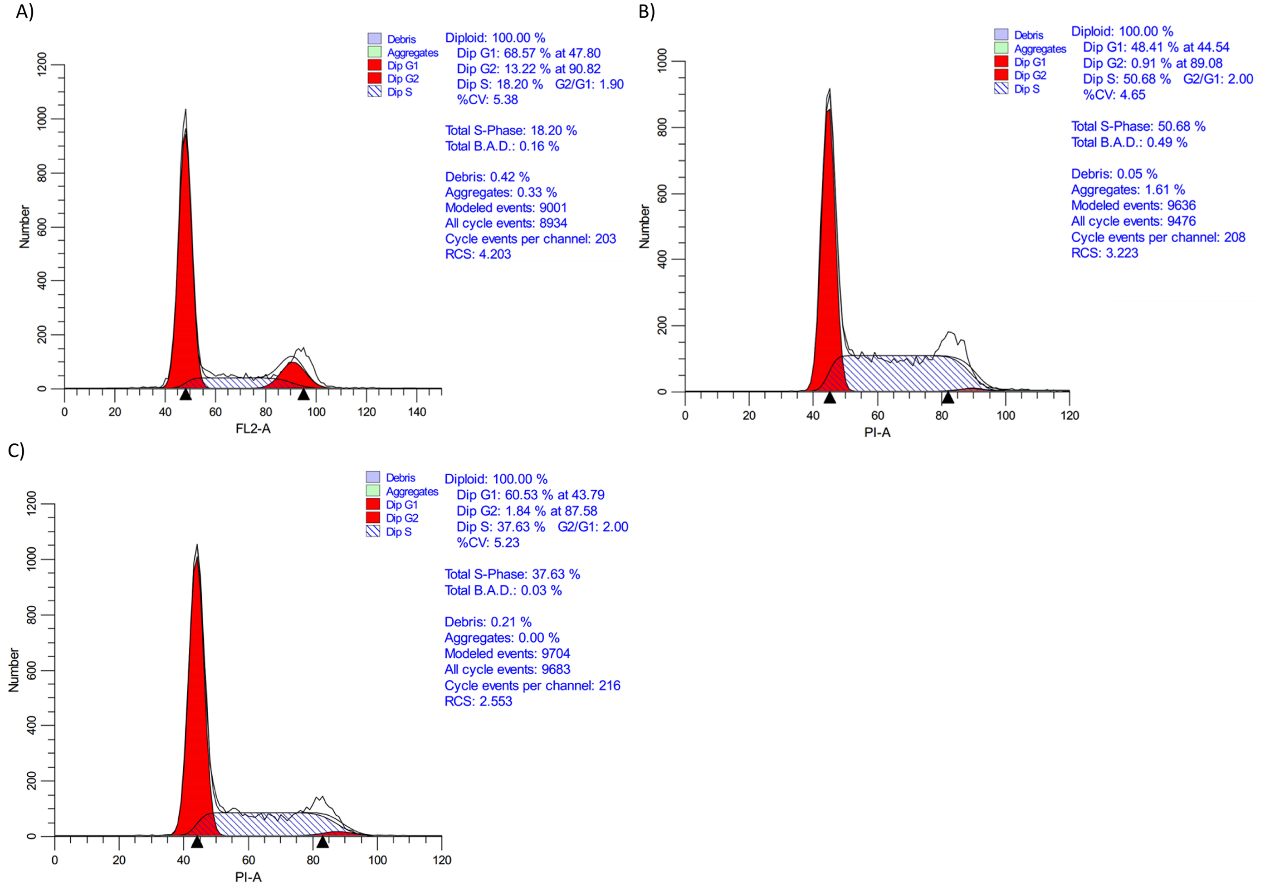


**Supplemental_Fig_S4. PI Analysis of percentage of cell cycle of different cell lines in continued culture**. Cells were labelled with PI (50ug/ml) and analyzed with FACS Callibur flow cytometer (BD Biosciences). ModFit LT software was applied to calculate percentage of G1/G0, S, G2/M phase. A) NIH3T3 cells were collected at ~70% density; B) MCF-7 cells were harvested at ~70% density; C) L929 cells were collected at ~70% density.


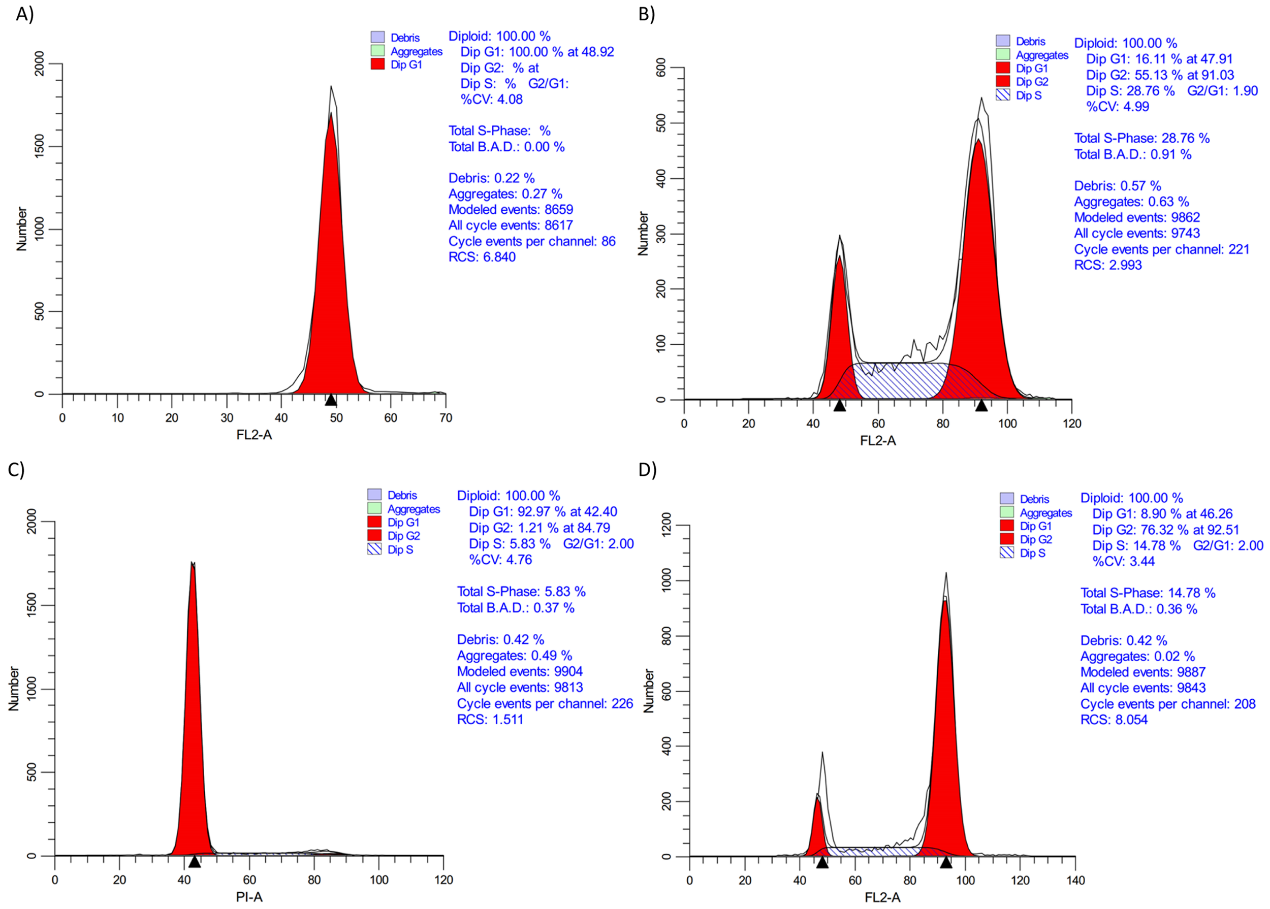


**Supplemental_Fig_S5. PI Analysis of percentage of cell cycle of synchronization of cell sample.** Cells were labelled with PI (50ug/ml) and analyzed the percentage of G1/G0, S, G2/M phase with FACS Callibur flow cytometer (BD Biosciences). **A)** NIH3T3 G1/G0 cells were acquired by contact inhibition; B) NIH3T3 G2/M phase cells were obtained by double thymidine block and release; C) L929 G1/G0 cells were obtained by serum starvation; D) L929 G2/M cells were acquired by double thymidine block and release.


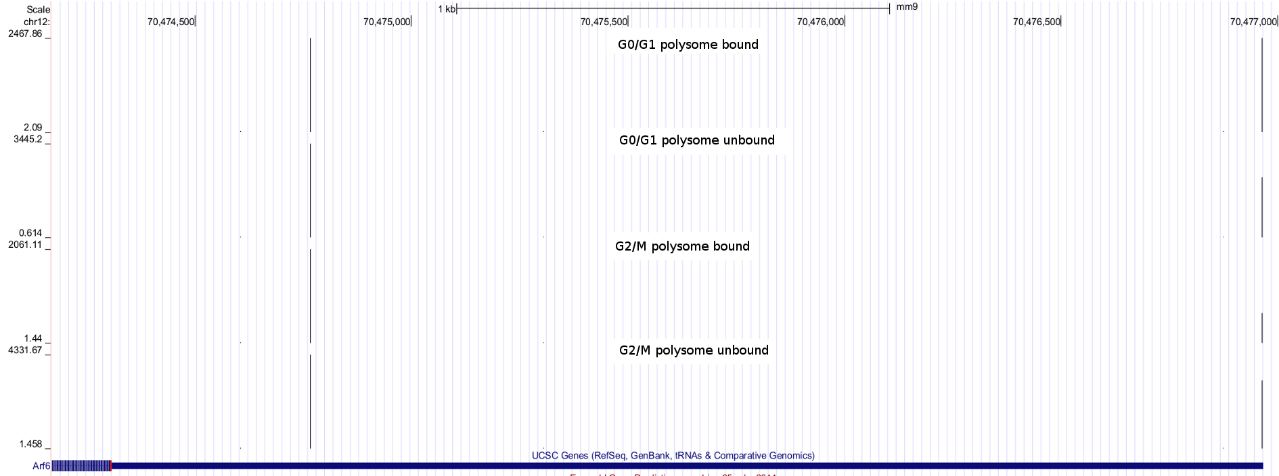


**Supplemental_Fig_S6. IVT-SAPAS reads distribution for *Arf6* gene at different cell-cycle phases of L929 cell line.**


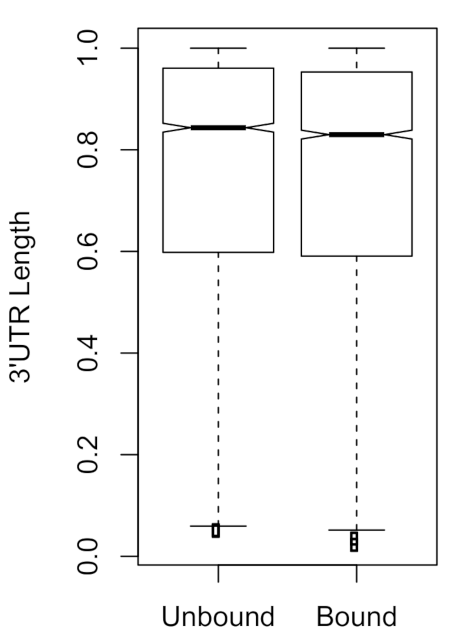


**Supplemental_Fig_S7. mRNAs bound with polysome shows shorter 3'UTRs in NIH3T3 cells culturing with 50% confluency.**


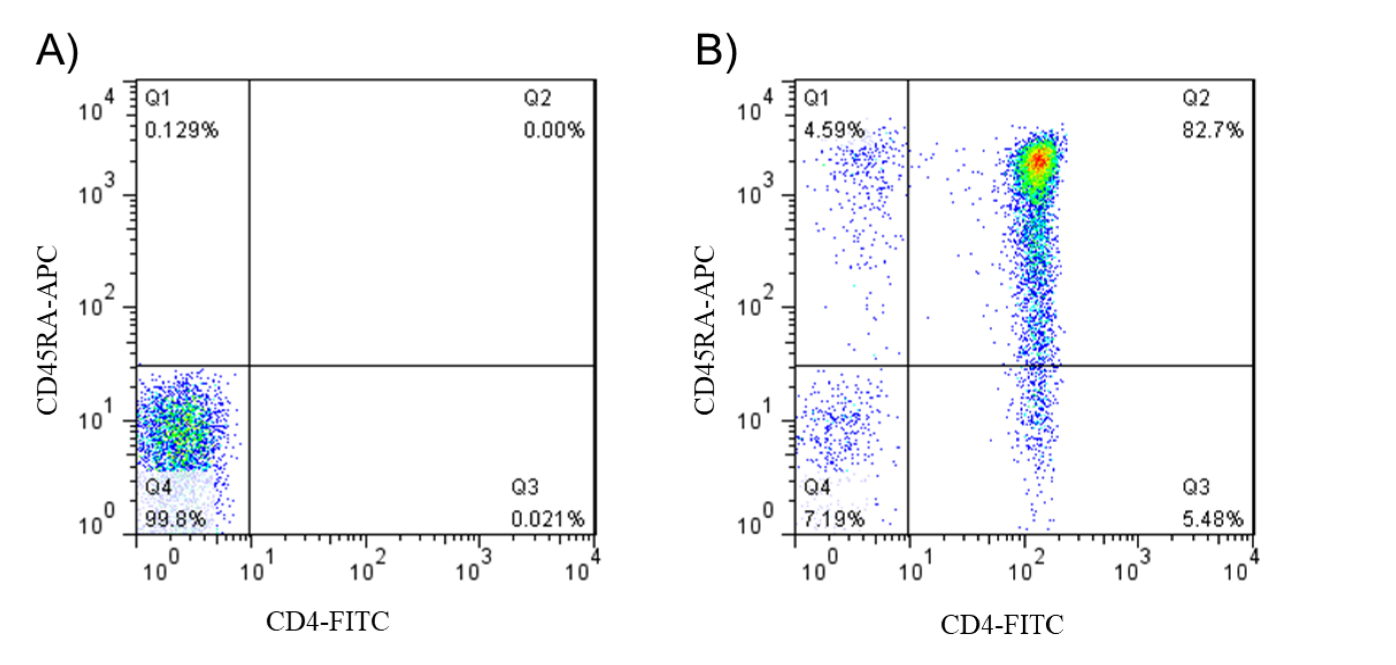


**Supplemental_Fig_S8. Analysis of purification of naive CD4+ T cells with Flow cytometer.** Flow cytometric analysis were performed for 1x 106 purified naive CD4+ T cells without (A) and with (B) anti-CD45RA-APC and anti-CD4-FITCs staining.
